# Supplementary material for: On the radiative lifetime, quantum yield and fluorescence decay of Alq in thin filmsElectronic supplementary information (ESI) available: Experimental data. See http://www.rsc.org/suppdata/cp/b2/b211264g/
Source: Royal Society of Chemistry journal article supplement (doi:10.1039/b211264g), 2003-02-25
Supplement: b211264g.doc [file b211264g.doc]

# **On the Radiative Lifetime, Quantum Yield and Fluorescence Decay of Alq in Thin Films**

**V. V. N. Ravi Kishore, K. L. Narasimhan and N. Periasamy***

Departments of Chemical Sciences and Condensed Matter Physics & Materials Sciences

Tata Institute of Fundamental Research

Homi Bhabha Road, Colaba, Mumbai – 400 005, INDIA

* Author for Correspondence. Fax: 091 22 215 2110 Email: peri@tifr.res.in

# **------------------------------------------------------------------------------------------------------------**

# **Supplementary Data**

# **Elemental Analysis Data of Alq (Vacuum Sublimed sample)**

| Element | Experimental value (%) | Theoretical value(%) |
| --- | --- | --- |
| Al | 6.0 | 5.88 |
| C | 70.6 | 70.59 |
| H | 3.3 | 3.92 |
| N | 8.6 | 9.15 |

**1H NMR Spectrum of 8-Hydroxyquinoline (8-HQ) in CDCl3**

**Solvent CHCl3**

**A**

**F**

**B**

**C,D**

**E**


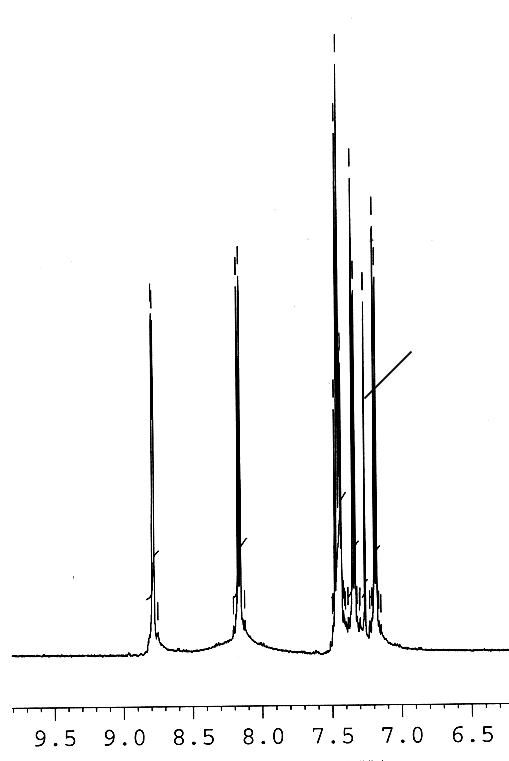


**1H NMR Spectrum of**
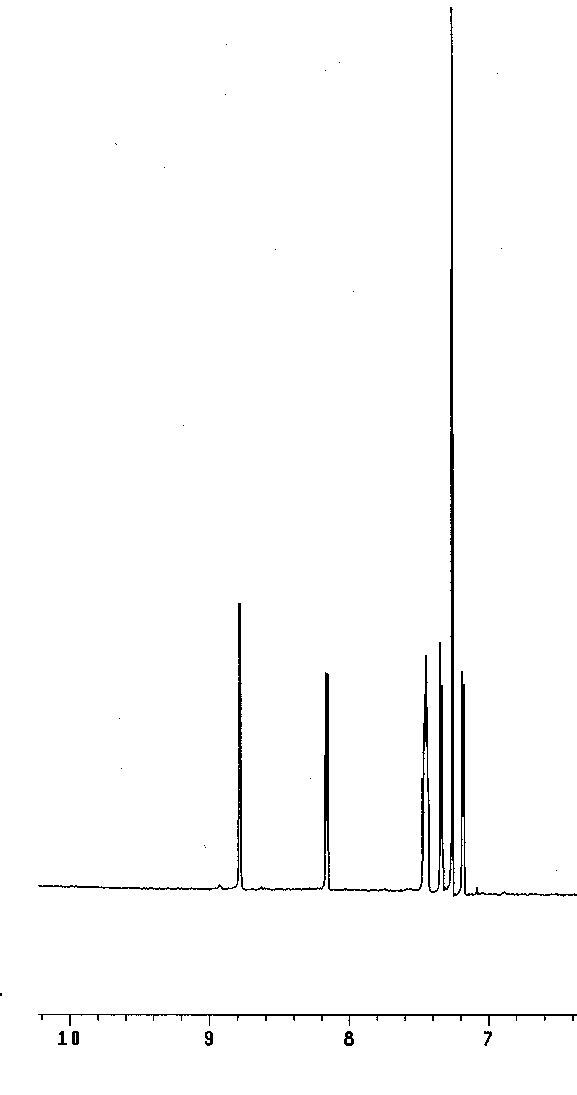
 **Tris(8-Hydroxyquinolinato) Aluminium (III) (Alq) in CDCl3**

**Solvent CHCl3**

# The above spectrum for Alq is similar that of 8-hydroxyquinoline given above. The protons of the ligand in Alq are similar to the protons in free 8-hydroxyquinoline.

1) The above spectrum for 8-Hydroxy quinoline is in agreement to the one given in the SDBS spectral database. http://www.aist.go.jp/RIODB/SDBS/sdbs/owa/sdbs_sea.cre_frame_sea

2) M. Alafandy et al, Inorganic Chimica Acta 255 (1997) 175-179.

The 1H nmr spectra of 8-Hydroxyquinoline and Alq were recorded on Varian-600 MHz instrument using tetramethylsilane (TMS) as the internal standard and the chemical shifts are given in the (ppm) scale. The peak at =7.26 ppm corresponds to the solvent.

The authors thank National NMR Facility in Tata Institute of Fundamental Research for the spectra given above.

**FT-IR Spectrum of Alq**

**FT-IR spectrum of Alq was recorded using Perkin Elmer FT-IR spectrometer (Model: Spectrum GX) in transmission mode geometry with nitrogen purging. The sample was deposited on porous silicon.**

The above spectrum is in agreement with the spectrum reported in

1) M.Halls and R.Aroca, Can. J.Chem, 1998, **76**, 1730.

2) X.M.Ding, L.M.Hung, C.S.Lee, S.T.Lee, Phy. Rev B, 1999, **60**, No-19, 13 291.

3) A.D.Esposti, M.Brinkmann, G.Ruani, R.Zamboni, Synth. Metals 2002, **127,** 247.
